# Supplementary material for: Evidence of Carbon Fixation Pathway in a Bacterium from Candidate Phylum SBR1093 Revealed with Genomic Analysis
Source: PubMed Central journal article supplement (PMC4195664; doi:10.1371/journal.pone.0109571), 2014-10-13
Supplement: pone.0109571.s001.pdf [file pone.0109571.s001.pdf]

**Supplementary material for**  
**Evidence of Carbon Fixation Pathway in a Bacterium from**  
**Candidate Phylum SBR1093 Revealed with Genomic Analysis**

Submitted to ***PLOS ONE***

Zhiping Wang<sup>1,2</sup>, Feng Guo<sup>1</sup>, Lili Liu<sup>1,3</sup>, Tong Zhang<sup>1\*</sup>

<sup>1</sup> Environmental Biotechnology Laboratory, The University of Hong Kong, Hong Kong;

<sup>2</sup> School of Environmental Science and Engineering, Shanghai Jiao Tong University, Shanghai;

<sup>3</sup> State Environmental Protection Key Laboratory of Environmental Risk Assessment and Control on Chemical Process, East China University of Science and Technology, Shanghai, China

\*Corresponding author: Tong Zhang, Environmental Biotechnology Laboratory, The University of Hong Kong, Hong Kong. Tel. 852-2857-8551, E-mail: [zhangt@hku.hk](mailto:zhangt@hku.hk)

**Total pages: 17**

**Figures: 4**

**Tables: 4**

**Figure S1** Phylogenetic tree of sequences of SBR1093 and the reference sequences from representative phyla. This phylogenetic tree is constructed with 16S rRNA gene sequences based on the maximum-likelihood method with Jukes and Cantor distances. Only bootstrap value of > 50% is labeled and the phylotypes of SRB1093 are marked with red in bold. The scale bar represents 0.1 nucleotide substitutions per site.

**Figure S2** Taxonomy of proteins in this SBR1093 HKSP. Proteins are converted with the predicted gene, and performed BLASTp against NCBI nr database (released at July 18, 2013). Therefore, it is imported into Megan for taxonomic classification.

**Figure S3** Putative nitrogen metabolic pathway of this SBR1093 HKSP (Adapted from KEGG).

**Figure S4** Suspected carbon fixation pathway possessed by this SBR1093 HKSP (Adapted from KEGG). Columns with solid fill indicate these enzymes are identified in this draft genome, which are connected with colorful lines and arrows and each color represents a type of carbon fixation pathway. Only the red one are full filled, which represents the HPHB cycle.

**Table S1** Universally occurring clusters of orthologous groups and tRNAs for amino acids identified in this draft genome.

**Table S2** List of ESCGs identified in this draft genome and their taxonomy.

**Table S3** Suspected genes in this draft genome that involving in the primary metabolism.

**Table S4** Suspected genes in this draft genome that involving in the antibiotics and heavy metal resistance or export.

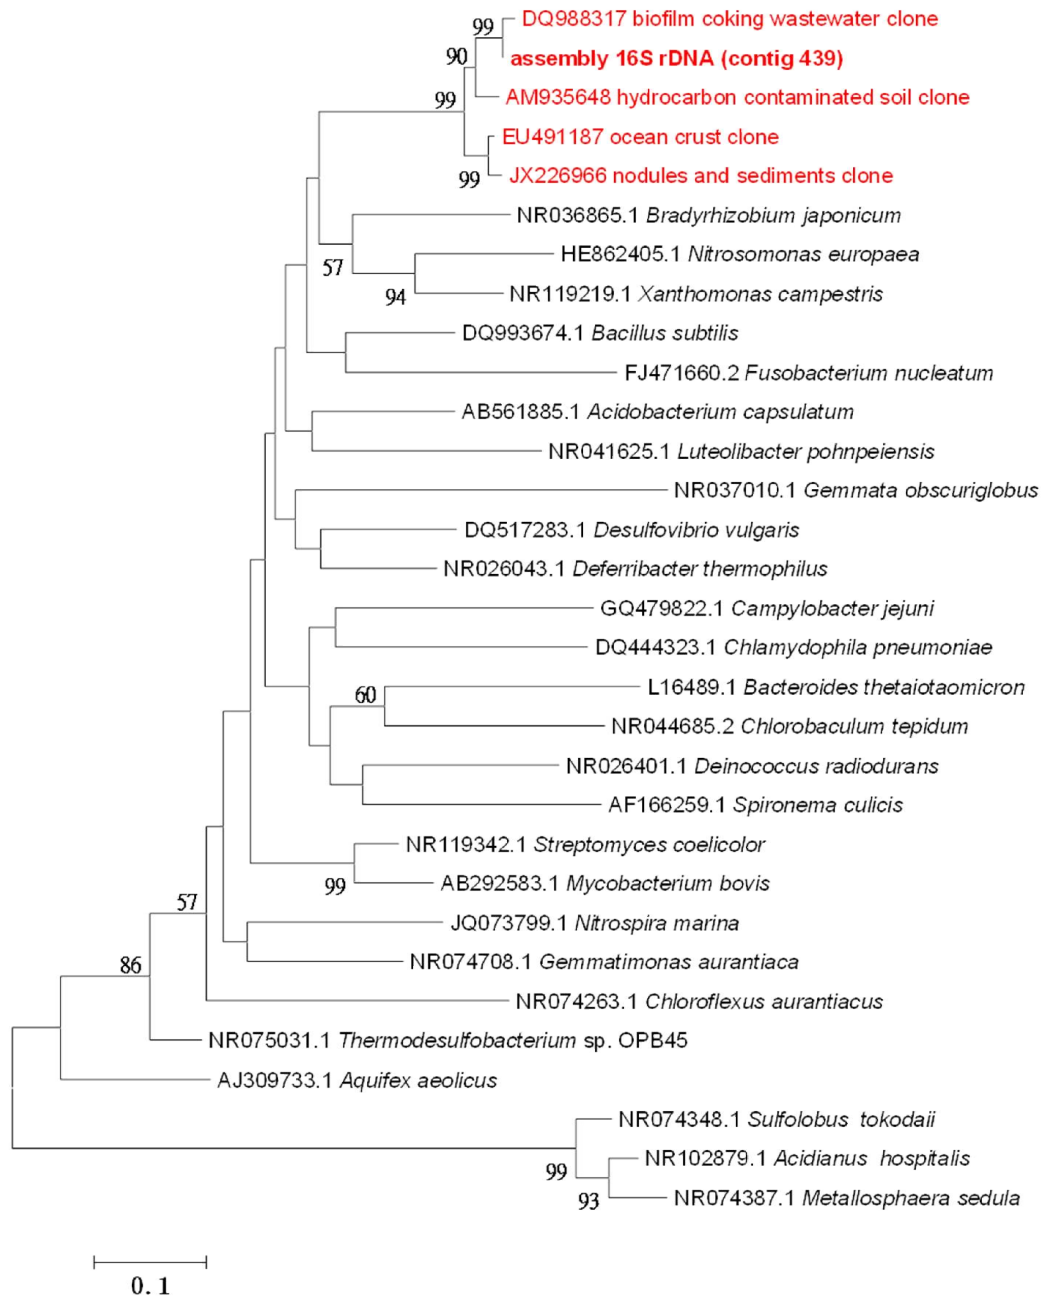

**Figure S1** Phylogenetic tree of sequences of SBR1093 and the reference sequences from representative phyla. This phylogenetic tree is constructed with 16S rRNA gene sequences based on the maximum-likelihood method with Jukes and Cantor distances. Only bootstrap value of > 50% is labeled and the phylotypes of SRB1093 are marked with red in bold. The scale bar represents 0.1 nucleotide substitutions per site.

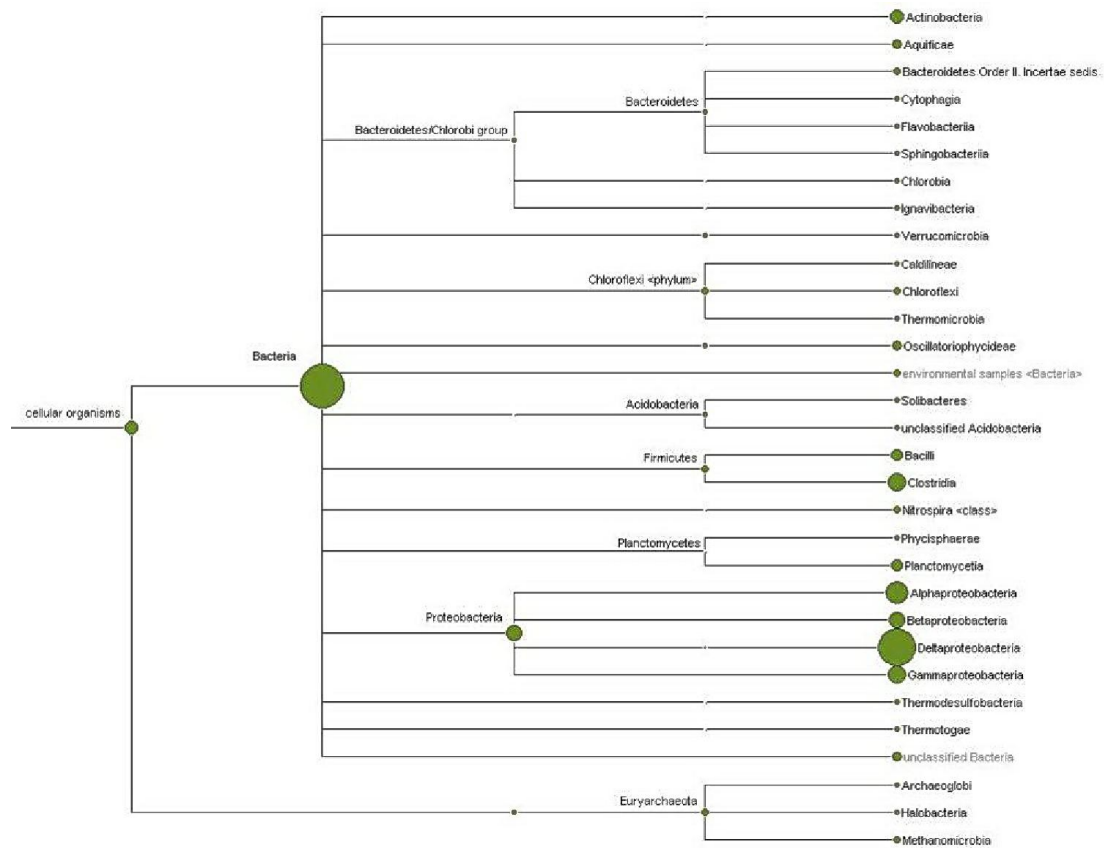

**Figure S2** Taxonomy of proteins in this SBR1093 HKSP. Proteins are converted with the predicted gene, and performed BLASTp against NCBI nr database (released at July 18, 2013). Therefore, the results can be imported into Megan for taxonomic classification.





**Table S1** 40 universally occurring clusters of orthologous groups and tRNAs for all  
20 amino acids.

| 40 Universal COGs |         |                                               |
|-------------------|---------|-----------------------------------------------|
| Gene_id           | COG No. | COG description                               |
| gene_316          | COG0012 | Predicted GTPase, probable translation factor |
| gene_817          | COG0016 | Phenylalanyl-tRNA synthetase alpha subunit    |
| gene_856          | COG0018 | Arginyl-tRNA synthetase                       |
| gene_1508         | COG0048 | Ribosomal protein S12                         |
| gene_1507         | COG0049 | Ribosomal protein S7                          |
| gene_546          | COG0052 | Ribosomal protein S2                          |
| gene_2384         | COG0080 | Ribosomal protein L11                         |
| gene_2385         | COG0081 | Ribosomal protein L1                          |
| gene_2388         | COG0085 | DNA-directed RNA polymerase, beta subunit     |
| gene_2964         | COG0087 | Ribosomal protein L3                          |
| gene_2965         | COG0088 | Ribosomal protein L4                          |
| gene_2967         | COG0090 | Ribosomal protein L2                          |
| gene_2969         | COG0091 | Ribosomal protein L22                         |
| gene_2970         | COG0092 | Ribosomal protein S3                          |
| gene_2974         | COG0093 | Ribosomal protein L14                         |
| gene_2976         | COG0094 | Ribosomal protein L5                          |
| gene_2978         | COG0096 | Ribosomal protein S8                          |
| gene_2979         | COG0097 | Ribosomal protein L6P/L9E                     |
| gene_2981         | COG0098 | Ribosomal protein S5                          |
| gene_2987         | COG0099 | Ribosomal protein S13                         |
| gene_2988         | COG0100 | Ribosomal protein S11                         |
| gene_2883         | COG0102 | Ribosomal protein L13                         |
| gene_2882         | COG0103 | Ribosomal protein S9                          |
| gene_757          | COG0124 | Histidyl-tRNA synthetase                      |
| gene_552          | COG0172 | Seryl-tRNA synthetase                         |
| gene_1783         | COG0184 | Ribosomal protein S15P/S13E                   |
| gene_2968         | COG0185 | Ribosomal protein S19                         |
| gene_2973         | COG0186 | Ribosomal protein S17                         |
| gene_2971         | COG0197 | Ribosomal protein L16/L10E                    |

|                         |         |                                            |
|-------------------------|---------|--------------------------------------------|
| gene_2982               | COG0200 | Ribosomal protein L15                      |
| gene_2983               | COG0201 | Preprotein translocase subunit SecY        |
| gene_2990               | COG0202 | DNA-directed RNA polymerase, alpha subunit |
| gene_1195               | COG0215 | Cysteinyl-tRNA synthetase                  |
| gene_2980               | COG0256 | Ribosomal protein L18                      |
| gene_2596               | COG0495 | Leucyl-tRNA synthetase                     |
| gene_2989               | COG0522 | Ribosomal protein S4 and related proteins  |
| gene_2390               | COG0525 | Valyl-tRNA synthetase                      |
| gene_887                | COG0533 | Metal-dependent proteases                  |
| gene_557                | COG0541 | Signal recognition particle GTPase         |
| gene_1079               | COG0552 | Signal recognition particle GTPase         |
| 20 tRNAs for amino acid |         |                                            |
| gene_2580               | COG0008 | glutamyl-tRNA synthetase                   |
| gene_2294               | COG0008 | glutamyl-tRNA synthetase                   |
| gene_2399               | COG0013 | alanyl-tRNA synthetase                     |
| gene_817                | COG0016 | phenylalanyl-tRNA synthetase alpha chain   |
| gene_856                | COG0018 | arginyl-tRNA synthetase                    |
| gene_1887               | COG0060 | isoleucyl-tRNA synthetase                  |
| gene_2682               | COG0072 | phenylalanyl-tRNA synthetase beta chain    |
| gene_757                | COG0124 | histidyl-tRNA synthetase                   |
| gene_1343               | COG0143 | methionyl-tRNA synthetase                  |
| gene_2901               | COG0162 | tyrosyl-tRNA synthetase                    |
| gene_552                | COG0172 | seryl-tRNA synthetase                      |
| gene_1535               | COG0173 | aspartyl-tRNA synthetase                   |
| gene_2943               | COG0180 | tryptophanyl-tRNA synthetase               |
| gene_1195               | COG0215 | cysteinyl-tRNA synthetase                  |
| gene_935                | COG0441 | threonyl-tRNA synthetase                   |
| gene_1257               | COG0442 | prolyl-tRNA synthetase                     |
| gene_3062               | COG0495 | leucyl-tRNA synthetase                     |
| gene_2390               | COG0525 | valyl-tRNA synthetase                      |
| gene_2832               | COG0751 | glycyl-tRNA synthetase beta chain          |
| gene_2834               | COG0752 | glycyl-tRNA synthetase alpha chain         |
| gene_2694               | COG1190 | lysyl-tRNA synthetase, class II            |
|                         |         |                                            |



**Table S2** List of ESCGs identified in this draft genome\*

|                  |                   |                              |                    |                  |                           |
|------------------|-------------------|------------------------------|--------------------|------------------|---------------------------|
| <b>gene_2689</b> | <b>PF00162.14</b> | <b><i>Thaumarchaeota</i></b> | gene_757           | TIGR00442        | <i>Proteobacteria</i>     |
| <b>gene_1216</b> | <b>PF00162.14</b> | <b>NA</b>                    | gene_1535          | TIGR00459        | <i>Firmicutes</i>         |
| gene_2966        | PF00276.15        | <i>Proteobacteria</i>        | gene_632           | TIGR00460        | <i>Proteobacteria</i>     |
| gene_2976        | PF00281.14        | <i>Proteobacteria</i>        | gene_817           | TIGR00468        | <i>Proteobacteria</i>     |
| gene_2964        | PF00297.17        | <i>Proteobacteria</i>        | gene_2682          | TIGR00472        | NA                        |
| gene_2979        | PF00347.18        | <i>Proteobacteria</i>        | gene_1788          | TIGR00487        | <i>Proteobacteria</i>     |
| gene_2973        | PF00366.15        | <i>Proteobacteria</i>        | gene_549           | TIGR00496        | <i>Firmicutes</i>         |
| gene_2882        | PF00380.14        | <i>Firmicutes</i>            | gene_1251          | TIGR00575        | <i>Proteobacteria</i>     |
| gene_2978        | PF00410.14        | <i>Proteobacteria</i>        | gene_2022          | TIGR00663        | NA                        |
| gene_2988        | PF00411.14        | <i>Proteobacteria</i>        | gene_1214          | TIGR00810        | NA                        |
| gene_2987        | PF00416.17        | <i>Proteobacteria</i>        | gene_2387          | TIGR00855        | <i>Proteobacteria</i>     |
| gene_2386        | PF00466.15        | <i>Proteobacteria</i>        | gene_2383          | TIGR00922        | <i>Proteobacteria</i>     |
| gene_2965        | PF00573.17        | <i>Proteobacteria</i>        | gene_1783          | TIGR00952        | <i>Proteobacteria</i>     |
| <b>gene_856</b>  | <b>PF00750.14</b> | <b><i>Firmicutes</i></b>     | gene_557           | TIGR00959        | <i>Firmicutes</i>         |
| <b>gene_2598</b> | <b>PF00750.14</b> | <b><i>Proteobacteria</i></b> | gene_664           | TIGR00963        | NA                        |
| gene_2307        | PF01025.14        | <i>Proteobacteria</i>        | gene_2382          | TIGR00964        | <i>Proteobacteria</i>     |
| gene_1060        | PF01795.14        | NA                           | gene_2983          | TIGR00967        | <i>Proteobacteria</i>     |
| gene_933         | TIGR00001         | NA                           | gene_1508          | TIGR00981        | <i>Proteobacteria</i>     |
| gene_558         | TIGR00002         | <i>Firmicutes</i>            | gene_2970          | TIGR01009        | <i>Proteobacteria</i>     |
| gene_449         | TIGR00009         | <i>Spirochaetes</i>          | gene_546           | TIGR01011        | <i>Firmicutes</i>         |
| gene_2972        | TIGR00012         | <i>Proteobacteria</i>        | gene_2989          | TIGR01017        | <i>Proteobacteria</i>     |
| gene_2106        | TIGR00019         | NA                           | gene_2981          | TIGR01021        | <i>Proteobacteria</i>     |
| gene_272         | TIGR00029         | <i>Actinobacteria</i>        | gene_562           | TIGR01024        | <i>Firmicutes</i>         |
| gene_2628        | TIGR00043         | <i>Firmicutes</i>            | gene_1507          | TIGR01029        | <i>Proteobacteria</i>     |
| gene_2991        | TIGR00059         | <i>Proteobacteria</i>        | <b>gene_2570_1</b> | <b>TIGR01030</b> | <b><i>Deinococcus</i></b> |
| gene_2980        | TIGR00060         | <i>Proteobacteria</i>        | gene_2326          | TIGR01031        | NA                        |
| gene_1926        | TIGR00061         | <i>Proteobacteria</i>        | gene_932           | TIGR01032        | NA                        |
| gene_1925        | TIGR00062         | <i>Proteobacteria</i>        | gene_2969          | TIGR01044        | <i>Proteobacteria</i>     |
| gene_1079        | TIGR00064         | NA                           | gene_2963          | TIGR01049        | <i>Proteobacteria</i>     |
| gene_1786        | TIGR00082         | <i>Proteobacteria</i>        | gene_2968          | TIGR01050        | <i>Proteobacteria</i>     |
| gene_164         | TIGR00086         | <i>Firmicutes</i>            | gene_814           | TIGR01059        | NA                        |
| gene_316         | TIGR00092         | NA                           | gene_2883          | TIGR01066        | <i>Firmicutes</i>         |
| gene_1149        | TIGR00115         | <i>Proteobacteria</i>        | gene_2974          | TIGR01067        | <i>Proteobacteria</i>     |

|                  |                  |                          |                  |                  |                              |
|------------------|------------------|--------------------------|------------------|------------------|------------------------------|
| gene_547         | TIGR00116        | <i>Firmicutes</i>        | gene_2982        | TIGR01071        | <i>Proteobacteria</i>        |
| gene_2582        | TIGR00152        | <i>Deinococcus</i>       | gene_2975        | TIGR01079        | <i>Proteobacteria</i>        |
| gene_403         | TIGR00158        | <i>Spirochaetes</i>      | gene_2971        | TIGR01164        | <i>Proteobacteria</i>        |
| gene_402         | TIGR00165        | <i>Spirochaetes</i>      | gene_2385        | TIGR01169        | <i>Proteobacteria</i>        |
| gene_401         | TIGR00166        | NA                       | gene_2967        | TIGR01171        | <i>Proteobacteria</i>        |
| gene_934         | TIGR00168        | NA                       | gene_1429        | TIGR01391        | NA                           |
| gene_2901        | TIGR00234        | NA                       | gene_2554        | TIGR01393        | <i>Deinococcus</i>           |
| gene_1957        | TIGR00337        | NA                       | gene_2384        | TIGR01632        | <i>Proteobacteria</i>        |
| gene_2399        | TIGR00344        | <i>Proteobacteria</i>    | gene_1789        | TIGR01953        | <i>Proteobacteria</i>        |
| gene_2021        | TIGR00362        | NA                       | gene_1189        | TIGR02012        | <i>Proteobacteria</i>        |
| gene_1887        | TIGR00392        | <i>Proteobacteria</i>    | gene_2388        | TIGR02013        | <i>Proteobacteria</i>        |
| gene_2598        | TIGR00396        | <i>Proteobacteria</i>    | gene_2990        | TIGR02027        | <i>Proteobacteria</i>        |
| gene_181         | TIGR00409        | <i>Proteobacteria</i>    | <b>gene_2311</b> | <b>TIGR02350</b> | <b><i>Proteobacteria</i></b> |
| gene_552         | TIGR00414        | <i>Firmicutes</i>        | <b>gene_2306</b> | <b>TIGR02350</b> | <b><i>Proteobacteria</i></b> |
| gene_935         | TIGR00418        | NA                       | gene_2389        | TIGR02386        | <i>Proteobacteria</i>        |
| gene_1923        | TIGR00420        | NA                       | gene_2182        | TIGR02397        | <i>Proteobacteria</i>        |
| gene_2390        | TIGR00422        | <i>Proteobacteria</i>    | gene_2679        | TIGR02432        | NA                           |
| gene_1195        | TIGR00435        | <i>Proteobacteria</i>    | gene_2426        | TIGR02729        | <i>Proteobacteria</i>        |
| <b>gene_1533</b> | <b>TIGR00436</b> | <b><i>Firmicutes</i></b> | gene_1760        | TIGR03263        | <i>Proteobacteria</i>        |
| <b>gene_3015</b> | <b>TIGR00436</b> | <b>NA</b>                | gene_3015        | TIGR03594        | NA                           |

\* Since there is no ESCGs set for this phylum, these ESCGs are identified based on HMM search with the relative taxonomy. Those suspected duplicates are marked with red bold, which may not be contaminations from other bacterium according to the genetic analysis. Gene\_2570\_1 represents the ESCG TIGR01030, encoding the ribosomal protein L34 with 44 amino acids, which is really existed on contig\_1317 but omitted by MetaGeneMark.

**Table S3** Genes in this draft genome that involving in the primary metabolism.

| Genes involving in Glycolysis / Gluconeogenesis pathway |        |           |                                               |
|---------------------------------------------------------|--------|-----------|-----------------------------------------------|
| Gene_id                                                 | KO No. | EC number | KO description                                |
| gene_365                                                | K01835 | 5.4.2.2   | phosphoglucomutase                            |
| gene_910                                                | K01810 | 5.3.1.9   | glucose-6-phosphate isomerase                 |
| gene_9                                                  | K03841 | 3.1.3.11  | fructose-1,6-bisphosphatase                   |
| gene_2075                                               | K00850 | 2.7.1.11  | 6-phosphofructokinase                         |
| gene_2690                                               | K01623 | 4.1.2.13  | fructose-bisphosphate aldolase                |
| gene_1215                                               | K01803 | 5.3.1.1   | triosephosphate isomerase (TIM)               |
| gene_2688                                               | K00134 | 1.2.1.12  | glyceraldehyde 3-phosphate dehydrogenase      |
| gene_1216                                               | K00927 | 2.7.2.3   | phosphoglycerate kinase                       |
| gene_2689                                               | K00927 | 2.7.2.3   | phosphoglycerate kinase                       |
| gene_857                                                | K15634 | 5.4.2.1   | phosphoglycerate mutase                       |
| gene_1820                                               | K01689 | 4.2.1.11  | enolase                                       |
| gene_1370                                               | K00873 | 2.7.1.40  | pyruvate kinase                               |
| gene_1659                                               | K00873 | 2.7.1.40  | pyruvate kinase                               |
| gene_1157                                               | K01792 | 5.1.3.15  | glucose-6-phosphate 1-epimerase               |
| gene_2677                                               | K00845 | 2.7.1.2   | glucokinase                                   |
| gene_914                                                | K00886 | 2.7.1.63  | polyphosphate glucokinase                     |
| gene_910                                                | K13810 | 5.3.1.9   | transaldolase / glucose-6-phosphate isomerase |
| gene_911                                                | K13810 | 5.3.1.9   | transaldolase / glucose-6-phosphate isomerase |
|                                                         |        |           |                                               |
| Genes involving in citrate cycle pathway                |        |           |                                               |
| gene_1951                                               | K01647 | 2.3.3.1   | citrate synthase                              |
| gene_2319                                               | K01681 | 4.2.1.3   | aconitate hydratase 1                         |
| gene_2320                                               | K01681 | 4.2.1.3   | aconitate hydratase 1                         |
| gene_838                                                | K00030 | 1.1.1.41  | isocitrate dehydrogenase (NAD <sup>+</sup> )  |
| gene_2318                                               | K00031 | 1.1.1.41  | isocitrate dehydrogenase                      |
| gene_1540                                               | K00164 | 1.2.4.2   | 2-oxoglutarate dehydrogenase E1 component     |
| gene_1541                                               | K00658 | 2.3.1.61  | 2-oxoglutarate dehydrogenase E2 component     |
| gene_831                                                | K01902 | 6.2.1.5   | succinyl-CoA synthetase alpha subunit         |

|                                              |        |             |                                                |
|----------------------------------------------|--------|-------------|------------------------------------------------|
| gene_2313                                    | K01903 | 6.2.1.5     | succinyl-CoA synthetase beta subunit           |
| gene_2655                                    | K00245 | 1.3.99.1    | fumarate reductase iron-sulfur protein         |
| gene_2315                                    | K00239 | 1.3.99.1    | succinate dehydrogenase flavoprotein subunit   |
| gene_2314                                    | K00240 | 1.3.99.1    | succinate dehydrogenase iron-sulfur protein    |
| gene_748                                     | K01679 | 4.2.1.2     | fumarate hydratase, class II                   |
| gene_2317                                    | K00024 | 1.1.1.37    | malate dehydrogenase                           |
| gene_720*                                    | K01637 | 4.1.3.1     | isocitrate lyase                               |
| gene_720*                                    | K01637 | 2.3.3.9     | Malate synthase                                |
| Genes involving in oxidative phosphorylation |        |             |                                                |
| gene_1712                                    | K00329 | EC:1.6.5.3  | NADH dehydrogenase                             |
| gene_2371                                    | K00329 | EC:1.6.5.3  | NADH dehydrogenase                             |
| gene_1349                                    | K00330 | EC:1.6.5.3  | NADH dehydrogenase I subunit A                 |
| gene_1350                                    | K00331 | EC:1.6.5.3  | NADH dehydrogenase I subunit B                 |
| gene_1351                                    | K00332 | EC:1.6.5.3  | NADH dehydrogenase I subunit C                 |
| gene_1352                                    | K00333 | EC:1.6.5.3  | NADH dehydrogenase I subunit D                 |
| gene_598                                     | K00334 | EC:1.6.5.3  | NADH dehydrogenase I subunit E                 |
| gene_736                                     | K00335 | EC:1.6.5.3  | NADH dehydrogenase I subunit F                 |
| gene_811                                     | K00336 | EC:1.6.5.3  | NADH dehydrogenase I subunit G                 |
| gene_812                                     | K00337 | EC:1.6.5.3  | NADH dehydrogenase I subunit H                 |
| gene_505                                     | K00338 | EC:1.6.5.3  | NADH dehydrogenase I subunit I                 |
| gene_1042                                    | K00339 | EC:1.6.5.3  | NADH dehydrogenase I subunit J                 |
| gene_1041                                    | K00340 | EC:1.6.5.3  | NADH dehydrogenase I subunit K                 |
| gene_1040                                    | K00341 | EC:1.6.5.3  | NADH dehydrogenase I subunit L                 |
| gene_1682                                    | K00342 | EC:1.6.5.3  | NADH dehydrogenase I subunit M                 |
| gene_1358                                    | K00343 | EC:1.6.5.3  | NADH dehydrogenase I subunit N                 |
| gene_2151                                    | K00356 | EC:1.6.99.3 | NADH dehydrogenase                             |
| gene_2660                                    | K00356 | EC:1.6.99.3 | NADH dehydrogenase                             |
| gene_732                                     | K03885 | EC:1.6.99.3 | NADH dehydrogenase                             |
| gene_774                                     | K03885 | EC:1.6.99.3 | NADH dehydrogenase                             |
| gene_1270                                    | K03885 | EC:1.6.99.3 | NADH dehydrogenase                             |
| gene_1471                                    | K03885 | EC:1.6.99.3 | NADH dehydrogenase                             |
| gene_505                                     | K03941 | EC:1.6.99.3 | NADH dehydrogenase (ubiquinone) Fe-S protein 8 |
| gene_2315                                    | K00239 | EC:1.3.99.1 | succinate dehydrogenase flavoprotein           |

|           |        |             |                                                            |
|-----------|--------|-------------|------------------------------------------------------------|
|           |        |             | subunit                                                    |
| gene_2314 | K00240 | EC:1.3.99.1 | succinate dehydrogenase iron-sulfur protein                |
| gene_2655 | K00245 | EC:1.3.99.1 | fumarate reductase iron-sulfur protein                     |
| gene_773  | K00412 | EC:1.10.2.2 | ubiquinol-cytochrome c reductase cytochrome b subunit      |
| gene_333  | K00404 | EC:1.9.3.1  | cb-type cytochrome c oxidase subunit I                     |
| gene_2498 | K00404 | EC:1.9.3.1  | cb-type cytochrome c oxidase subunit I                     |
| gene_1593 | K00405 | EC:1.9.3.1  | cb-type cytochrome c oxidase subunit II                    |
| gene_2499 | K00405 | EC:1.9.3.1  | cb-type cytochrome c oxidase subunit II                    |
| gene_2500 | K00405 | EC:1.9.3.1  | cb-type cytochrome c oxidase subunit II                    |
| gene_335  | K00406 | EC:1.9.3.1  | cb-type cytochrome c oxidase subunit III                   |
| gene_1593 | K00406 | EC:1.9.3.1  | cb-type cytochrome c oxidase subunit III                   |
| gene_2184 | K00406 | EC:1.9.3.1  | cb-type cytochrome c oxidase subunit III                   |
| gene_919  | K02266 | EC:1.9.3.1  | cytochrome c oxidase subunit VIa                           |
| gene_768  | K02274 | EC:1.9.3.1  | cytochrome c oxidase subunit I                             |
| gene_1555 | K02274 | EC:1.9.3.1  | cytochrome c oxidase subunit I                             |
| gene_1776 | K02274 | EC:1.9.3.1  | cytochrome c oxidase subunit I                             |
| gene_767  | K02275 | EC:1.9.3.1  | cytochrome c oxidase subunit II                            |
| gene_1556 | K02275 | EC:1.9.3.1  | cytochrome c oxidase subunit II                            |
| gene_2500 | K02275 | EC:1.9.3.1  | cytochrome c oxidase subunit II                            |
| gene_769  | K02276 | EC:1.9.3.1  | cytochrome c oxidase subunit III                           |
| gene_1554 | K02276 | EC:1.9.3.1  | cytochrome c oxidase subunit III                           |
| gene_1553 | K02277 | EC:1.9.3.1  | cytochrome c oxidase subunit IV                            |
| gene_37   | K02108 | EC:3.6.3.14 | F-type H <sup>+</sup> -transporting ATPase subunit a       |
| gene_570  | K02109 | EC:3.6.3.14 | F-type H <sup>+</sup> -transporting ATPase subunit b       |
| gene_571  | K02109 | EC:3.6.3.14 | F-type H <sup>+</sup> -transporting ATPase subunit b       |
| gene_36   | K02110 | EC:3.6.3.14 | F-type H <sup>+</sup> -transporting ATPase subunit c       |
| gene_568  | K02111 | EC:3.6.3.14 | F-type H <sup>+</sup> -transporting ATPase subunit alpha   |
| gene_566  | K02112 | EC:3.6.3.14 | F-type H <sup>+</sup> -transporting ATPase subunit beta    |
| gene_569  | K02113 | EC:3.6.3.14 | F-type H <sup>+</sup> -transporting ATPase subunit delta   |
| gene_565  | K02114 | EC:3.6.3.14 | F-type H <sup>+</sup> -transporting ATPase subunit epsilon |
| gene_567  | K02115 | EC:3.6.3.14 | F-type H <sup>+</sup> -transporting ATPase subunit         |

|           |        |            |                           |
|-----------|--------|------------|---------------------------|
|           |        |            | gamma                     |
| gene_400  | K01507 | EC:3.6.1.1 | inorganic pyrophosphatase |
| gene_3046 | K01507 | EC:3.6.1.1 | inorganic pyrophosphatase |
| gene_2613 | K00937 | EC:2.7.4.1 | polyphosphate kinase      |
| gene_2646 | K00937 | EC:2.7.4.1 | polyphosphate kinase      |

\* Gene\_720 represents a fusion gene of PF01274 and PF00463, responsible for malate synthase and isocitrate lyase, which are expressed synchronously to complement the glyoxylate shunt.

**Table S4** Genes in this draft genome with putative antibiotics and heavy metal resistance potential.

| Genes | putative type for antibiotics resistance                                 |
|-------|--------------------------------------------------------------------------|
| 204   | antibiotic transport system ATP-binding protein                          |
| 252   | antibiotic transport system ATP-binding protein                          |
| 309   | antibiotic transport system ATP-binding protein                          |
| 1539  | antibiotic transport system ATP-binding protein                          |
| 1963  | antibiotic transport system ATP-binding protein                          |
| 1964  | antibiotic transport system ATP-binding protein                          |
| 1965  | antibiotic transport system ATP-binding protein                          |
| 205   | antibiotic transport system permease protein                             |
| 206   | antibiotic transport system permease protein                             |
| 310   | antibiotic transport system permease protein                             |
| 1962  | antibiotic transport system permease protein                             |
| 2610  | beta-lactamase                                                           |
| 2611  | beta-lactamase                                                           |
| 891   | MarR family transcriptional regulator                                    |
| 1154  | MarR family transcriptional regulator                                    |
| 3030  | MarR family transcriptional regulator                                    |
| 674   | MFS transporter, DHA1 family, multidrug resistance protein               |
| 1751  | MFS transporter, DHA1 family, multidrug resistance protein               |
| 2692  | MFS transporter, DHA1 family, multidrug resistance protein               |
| 2374  | MFS transporter, DHA1 family, tetracycline resistance protein            |
| 2954  | MFS transporter, DHA1 family, tetracycline resistance protein            |
| 1374  | MFS transporter, DHA2 family, methyl viologen resistance protein<br>SmvA |
| 2509  | MFS transporter, DHA2 family, methylenomycin A resistance protein        |
| 674   | MFS transporter, DHA2 family, multidrug resistance protein B             |
| 1375  | MFS transporter, DHA2 family, multidrug resistance protein B             |
| 2533  | MFS transporter, DHA2 family, multidrug resistance protein B             |
| 1710  | multidrug resistance outer membrane protein OprJ                         |
| 1711  | multidrug resistance outer membrane protein OprJ                         |
| 1743  | multidrug resistance outer membrane protein OprJ                         |
| 219   | multidrug resistance protein A                                           |
| 778   | multidrug resistance protein A                                           |

|       |                                                       |
|-------|-------------------------------------------------------|
| 1940  | multidrug resistance protein A                        |
| 1901  | penicillin-binding protein 1A                         |
| 1571  | penicillin-binding protein 1C                         |
| 1560  | penicillin-binding protein 2                          |
| 2164  | penicillin-insensitive murein endopeptidase           |
| 16    | putative drug exporter of the RND superfamily         |
| 464   | putative drug exporter of the RND superfamily         |
| 801   | putative drug exporter of the RND superfamily         |
| 1114  | putative drug exporter of the RND superfamily         |
| 1566  | putative drug exporter of the RND superfamily         |
| 1631  | putative drug exporter of the RND superfamily         |
| 1947  | putative drug exporter of the RND superfamily         |
| 2007  | putative drug exporter of the RND superfamily         |
| 2269  | putative drug exporter of the RND superfamily         |
| 2496  | putative drug exporter of the RND superfamily         |
| 2671  | putative drug exporter of the RND superfamily         |
| 1261  | putative multidrug efflux transporter MdtA            |
| 2070  | putative multidrug efflux transporter MdtA            |
|       |                                                       |
| Genes | putative type for heavy metal resistance              |
| 195   | arsenate reductase                                    |
| 196   | arsenate reductase                                    |
| 2256  | arsenate reductase                                    |
| 2523  | arsenical resistance protein ArsH                     |
| 2014  | arsenite methyltransferase                            |
| 318   | arsenite-transporting ATPase                          |
| 1247  | arsenite-transporting ATPase                          |
| 1384  | arsenite-transporting ATPase                          |
| 2134  | arsenite-transporting ATPase                          |
| 1662  | chromate transporter                                  |
| 1775  | Cu(I)/Ag(I) efflux system membrane protein CusA       |
| 1602  | Cu(I)/Ag(I) efflux system membrane protein CusB       |
| 1774  | Cu(I)/Ag(I) efflux system membrane protein CusB       |
| 1710  | Cu(I)/Ag(I) efflux system outer membrane protein CusC |
| 1743  | Cu(I)/Ag(I) efflux system outer membrane protein CusC |
| 1939  | Cu(I)/Ag(I) efflux system outer membrane protein CusC |
| 330   | Cu <sup>2+</sup> -exporting ATPase                    |



|      |                                      |
|------|--------------------------------------|
| 331  | Cu <sup>2+</sup> -exporting ATPase   |
| 1603 | Cu <sup>2+</sup> -exporting ATPase   |
| 2227 | Cu <sup>2+</sup> -exporting ATPase   |
| 2502 | Cu <sup>2+</sup> -exporting ATPase   |
| 2503 | Cu <sup>2+</sup> -exporting ATPase   |
| 1593 | putative copper resistance protein D |
| 1272 | suppressor for copper-sensitivity B  |
| 299  | heavy-metal exporter, HME family     |
| 1711 | heavy-metal exporter, HME family     |
| 1773 | heavy-metal exporter, HME family     |
| 1937 | mercuric reductase                   |
